# Supplementary material for: Genetic and behavioral adaptation of Candida parapsilosis to the microbiome of hospitalized infants revealed by in situ genomics, transcriptomics and proteomics
Source: bioRxiv or medRxiv preprint supplement (doi:10.1101/2020.03.23.004093), 2020-03-25
Supplement: Supplementary file [file media-1.pdf]

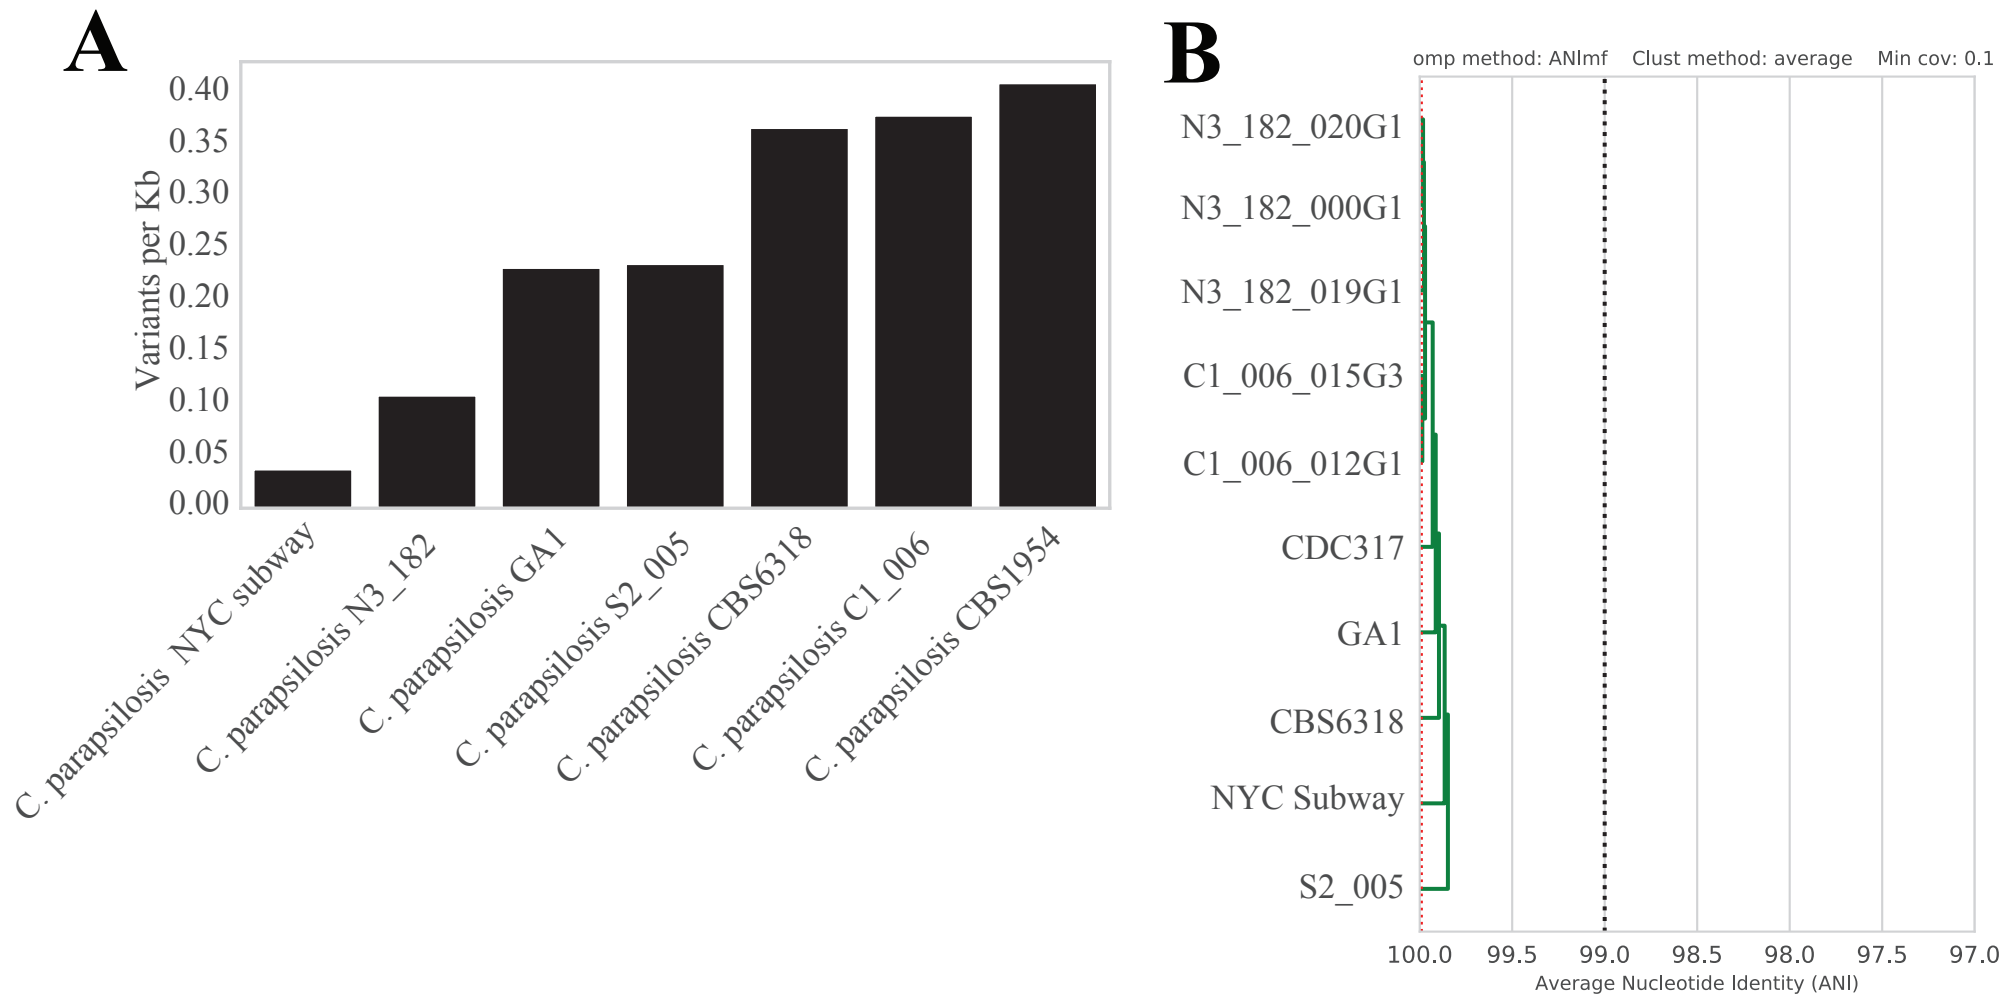

Figure S1: **Candida parapsilosis heterozygosity and ANI comparisons display low C. parapsilosis heterozygosity, even in a metagenome context, and a possible hospital associated population.** (A) *C. parapsilosis* heterozygosity for various strains as measured by heterozygous variants per kb. (B) ANI comparisons for each *C. parapsilosis* strain. Comparisons made using dRep with the ‘compare\_wf’ setting. If multiple genomes were assembled for the same strain from different time points, all assembled genomes were included in this analysis.
