# Supplementary material for: Genetic and behavioral adaptation of Candida parapsilosis to the microbiome of hospitalized infants revealed by in situ genomics, transcriptomics and proteomics
Source: bioRxiv or medRxiv preprint supplement (doi:10.1101/2020.03.23.004093), 2020-03-25
Supplement: Supplementary file [file media-3.pdf]

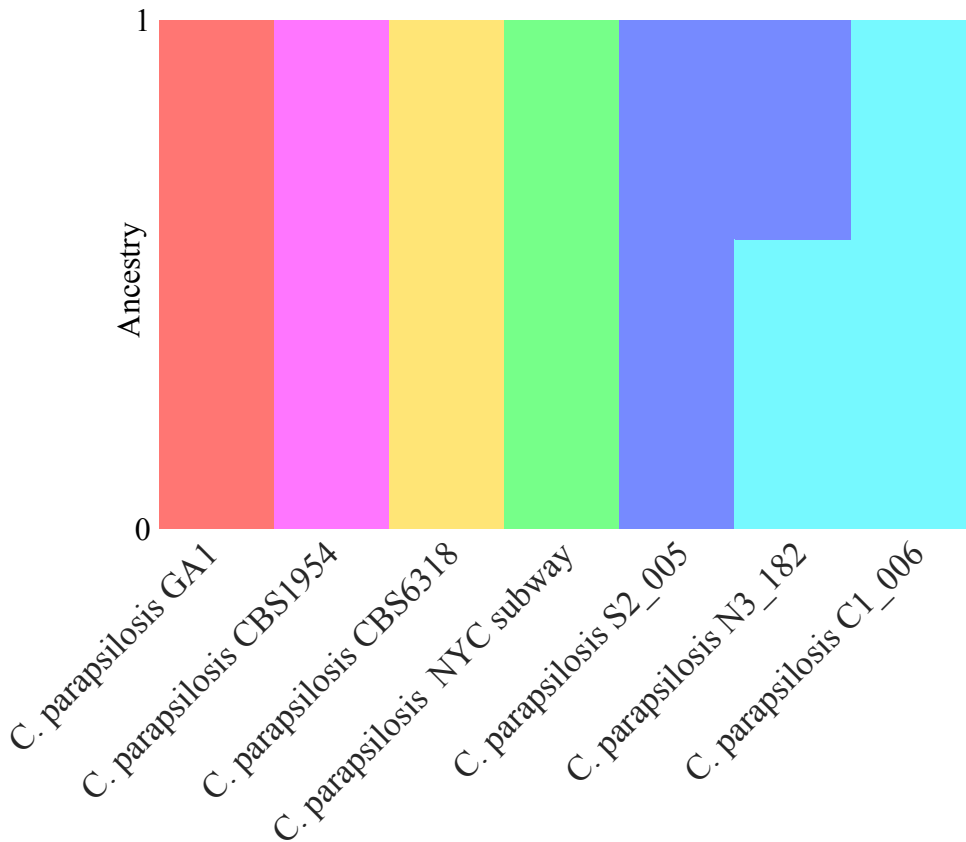

**Figure S3: Population structure analysis of *C. parapsilosis* strain genomes performed with ADMIXTURE (Alexander et al. 2011) reveals possible admixture in strain N3\_182.** Each color represents a different ancestral population (N=6) and the proportion of a color in each strain represents how much of the variation in its genome is attributed to that particular ancestral population. All strains except N3\_182 are predicted to have a separate ancestral population.
