# Supplementary material for: Genetic and behavioral adaptation of Candida parapsilosis to the microbiome of hospitalized infants revealed by in situ genomics, transcriptomics and proteomics
Source: bioRxiv or medRxiv preprint supplement (doi:10.1101/2020.03.23.004093), 2020-03-25
Supplement: Supplementary file [file media-6.pdf]

# Infant 06 RTA3 expression over time

Fluconazole treatment

Caspofungin treatment

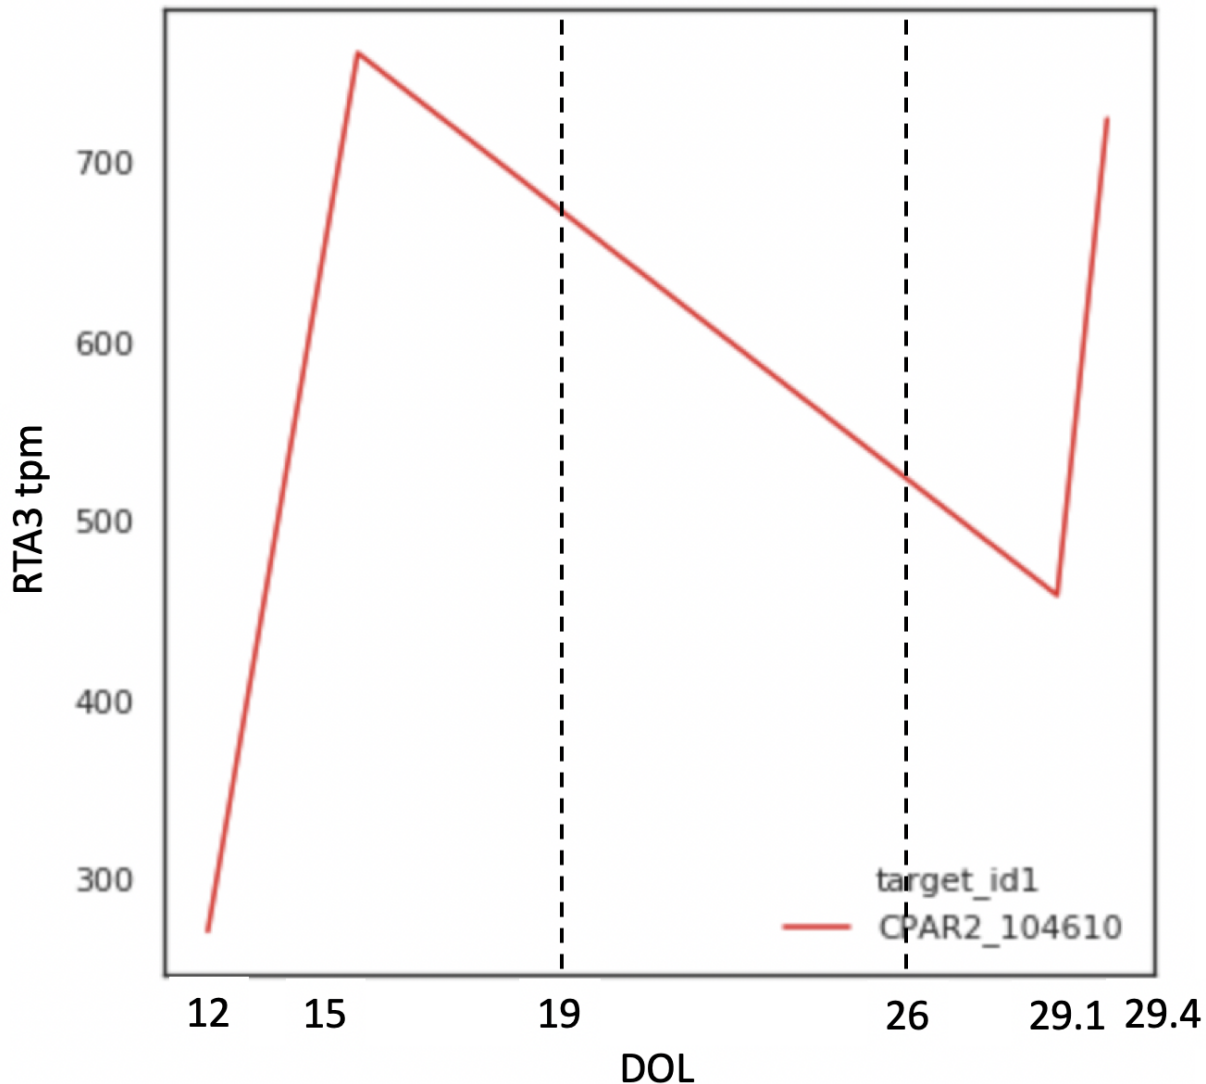

**Figure S6: Expression of RTA3 over time in infant 06 for strain C1\_006 shows no clear response to fluconazole treatment at the time points measured.** Fluconazole treatment was administered to infant 06 at DOL 19 and caspofungin treatment at DOL 26.
